# Supplementary material for: Proteomic Analysis of Roots Response to Potassium Deficiency and the Effect of TaHAK1-4A on K+ Uptake in Wheat
Source: MDPI journal article supplement (doi:10.3390/ijms232113504), 2022-11-04
Supplement: s1 [file s1]

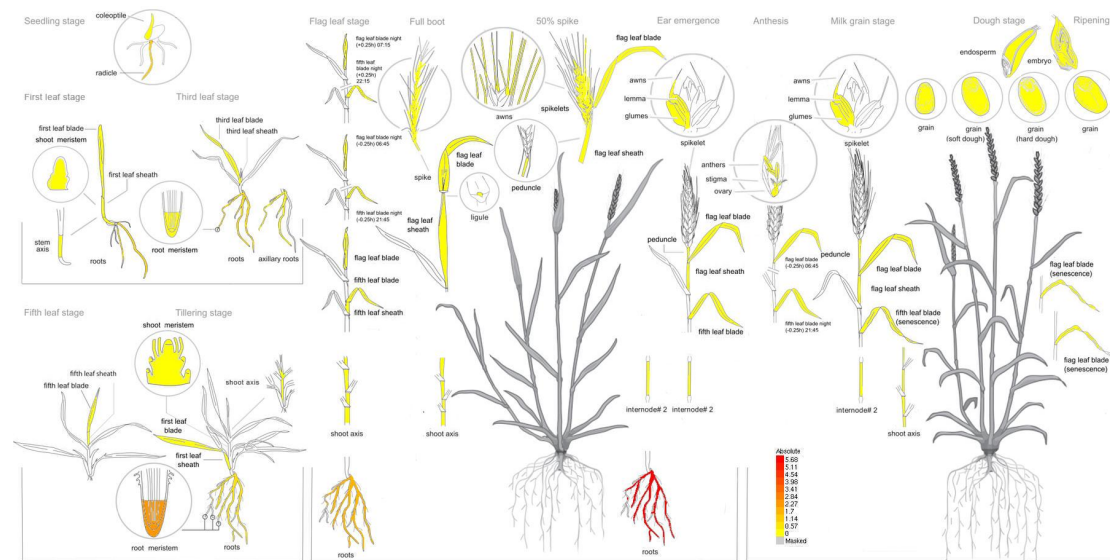

**Figure S2.** Expression level analysis of *TaHAK1-4A* in various development stages. Data were downloaded from [http://bar.utoronto.ca/efp\\_wheat/cgi-bin/efpWeb.cgi](http://bar.utoronto.ca/efp_wheat/cgi-bin/efpWeb.cgi). Expression levels were summarized as TPM from the transcript to the gene level using tximport v1.2.0.
